# Supplementary material
Source: MDPI journal article supplement (https://www.mdpi.com/2076-3417/14/5/2208)
Supplement: s1 [file s1]

**Supplements Table S1.** Methods and media used for microbiological enumeration and detection in dried mushrooms.

| Target/Detection limit                                                          | Method                                                                                                                                                                                                          | Media                                                                                                                                                                                                               |
|---------------------------------------------------------------------------------|-----------------------------------------------------------------------------------------------------------------------------------------------------------------------------------------------------------------|---------------------------------------------------------------------------------------------------------------------------------------------------------------------------------------------------------------------|
| Aerobic mesophilic counts (AMC)/<br>2.0 log cfu/g                               | ISO 4833-2:2013 Microbiology of the food chain — Horizontal method for the enumeration of microorganisms — Part 2: Colony count at 30 degrees C by the surface plating technique. <sup>D</sup>                  | Enumeration:<br>Tryptic-Casein Soy Agar with 0.6% yeast extract <sup>A</sup>                                                                                                                                        |
| <i>Enterobacteriaceae</i> (EB)/<br>1.0 log cfu/g                                | ISO 21528-2:2017 Microbiology of the food chain — Horizontal method for the detection and enumeration of <i>Enterobacteriaceae</i> — Part 2: Colony-count technique. <sup>D</sup>                               | Enumeration:<br>Violet Red Bile Glucose Agar <sup>A</sup>                                                                                                                                                           |
| presumptive <i>Bacillus cereus</i> (BAC)/<br>1.0 log cfu/g                      | ISO 7932:2004/ Amd. 1: 2020 Microbiology of food and animal feeding stuffs — Horizontal method for the enumeration of presumptive <i>Bacillus cereus</i> — Colony-count technique at 30 degrees C. <sup>D</sup> | Enumeration:<br>Mannitol Egg Yolk Polymyxin Agar <sup>B</sup>                                                                                                                                                       |
| Yeast and molds/<br>2.0 log cfu/g                                               | in-house (Incubation: 120 h, 25 °C)                                                                                                                                                                             | Enumeration:<br>Rose-Bengal Chloramphenicol Agar <sup>B</sup>                                                                                                                                                       |
| <i>Listeria</i> ( <i>L.</i> ) spp. & <i>L. monocytogenes</i> / presence/absence | ISO 11290-1:2017 Microbiology of the food chain — Horizontal method for the detection and enumeration of <i>Listeria monocytogenes</i> and of <i>Listeria</i> spp. — Part 1: Detection method. <sup>D</sup>     | Enrichments:<br>Half Fraser & Fraser broth <sup>A</sup><br>Detection:<br><i>Listeria</i> Agar acc. to Ottaviani & Agosti <sup>C</sup>                                                                               |
| <i>Salmonella</i> spp./ presence/absence                                        | ISO 6779-1:2017 Microbiology of the food chain — Horizontal method for the detection, enumeration and serotyping of <i>Salmonella</i> — Part 1: Detection of <i>Salmonella</i> spp. <sup>D</sup>                | Enrichments:<br>buffered peptone water <sup>A</sup> , Rappaport-Vassiliadis-Soy broth & Müller-Kauffmann Tetrathionate-Novobiocin broth <sup>C</sup><br>Detection:<br>Xylose-Lysine-Desoxycholate Agar <sup>C</sup> |

Abbreviations: <sup>A</sup> Biokar, Groupe Solabia, Pantin Cedex, France, <sup>B</sup> Thermo Fisher Scientific Inc., Oxoid, Waltham, MA, USA, <sup>C</sup> BioMérieux, Marcy-l'Etoile, Frankreich, <sup>D</sup> International Organization for Standardization: Geneva, Switzerland.
